# Supplementary material for: Centromeric Barrier Disruption Leads to Mitotic Defects in Schizosaccharomyces pombe
Source: PubMed Central journal article supplement (PMC4059236; doi:10.1534/g3.114.010397), 2014-02-13
Supplement: supp_g3.114.010397_010397SI.pdf [file supp_g3.114.010397_010397SI.pdf]

## **Centromeric barrier disruption leads to mitotic defects in *Schizosaccharomyces pombe***

Terilyn L. Gaither\*, Stephanie L. Merrett<sup>1</sup>\*, Matthew J. Pun\*, and Kristin C. Scott\*<sup>§</sup>

\*Institute for Genome Sciences and Policy  
Duke University  
DUMC 3382  
Durham, NC 27708

<sup>§</sup> Department of Molecular Genetics and Microbiology  
Duke University Medical Center  
Durham NC 27710

<sup>1</sup>Present Address:  
Max Planck Institute of Molecular Cell Biology and Genetics  
Pfotenhauerstrasse 108  
01307 Dresden  
Germany

Corresponding Author:  
Kristin C. Scott  
Institute for Genome Sciences and Policy  
Duke University  
101 Science Drive Box 3382  
Durham NC 27708  
(919) 684-7938  
kristin.scott@duke.edu

**DOI: 10.1534/g3.114.010397**

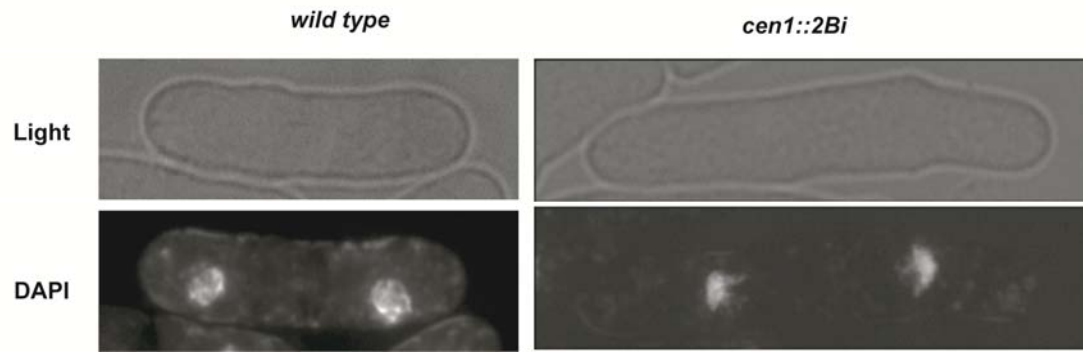

**Figure S1** The *cen1::2Bi* mutant displays abnormally long morphology. Light and fluorescence microscopy images of binuclear cells of the indicated ethanol-fixed strains with DAPI staining of the DNA.

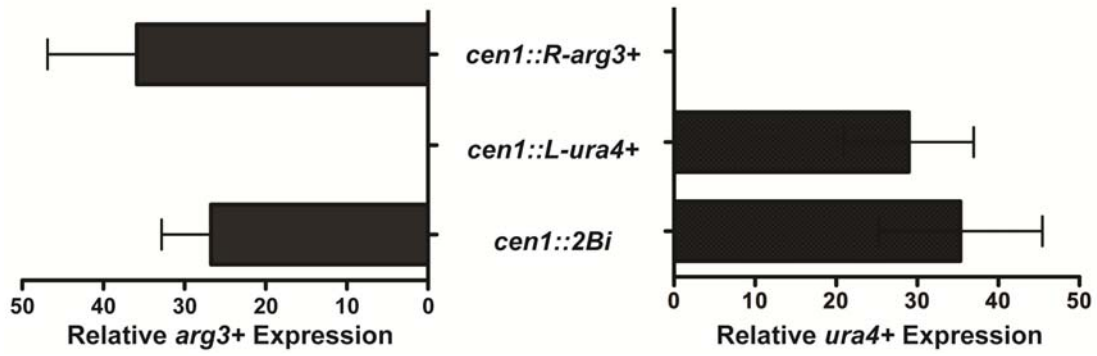

**Figure S2** Barriers are intact in the *cen1::2Bi* mutant. Relative *ura4*<sup>+</sup> and *arg3*<sup>+</sup> gene expression in *cen1::L-ura4+*, *cen1::R-arg3+* and *cen1::2Bi* strains. Reporter gene expression was assayed by quantitative RT-PCR and values are reported as expression relative to an internal control, *act1*<sup>+</sup>.

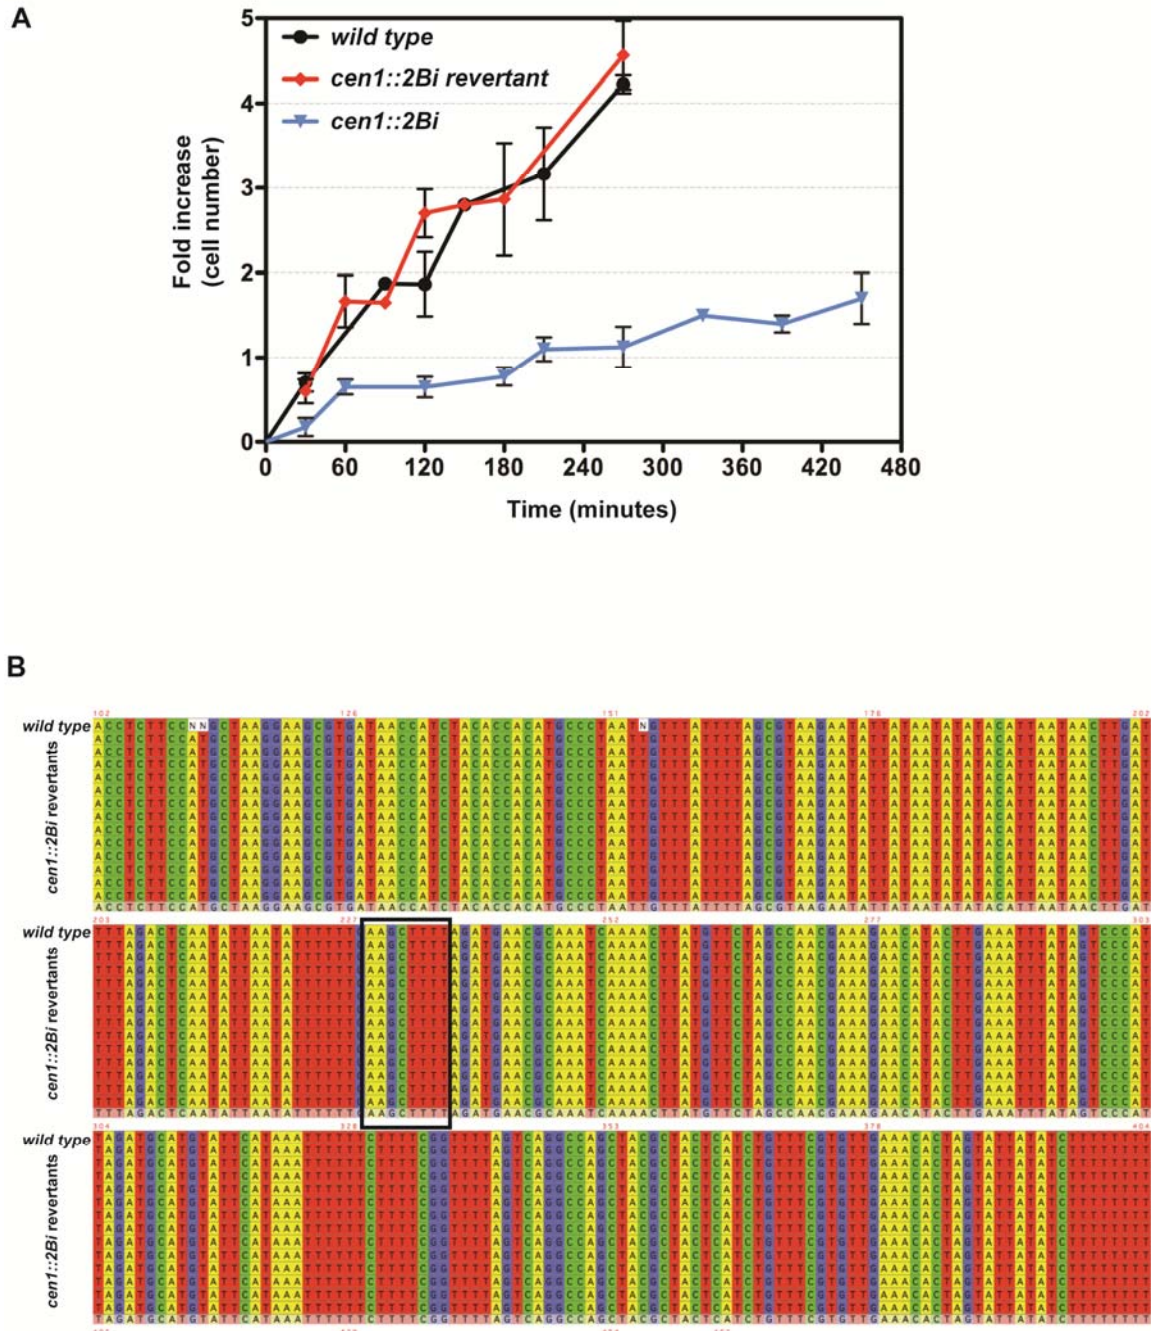

**Figure S3** The *cen1::2Bi* revertant strains have wild-type growth kinetics and sequence. (A) Growth kinetics of *cen1::2Bi* revertant strains in non-selective media at 32°C. For comparison, the kinetics of WT and *cen1::2Bi* strains in selective media at 32°C are also displayed. These data are identical to those in Figure 1C. (B) Partial sequence analysis of *cen1::2Bi* revertant strains. The site of reporter gene insertion (Hind III site) is boxed.

**Quantitative RT-PCR**

Total nucleic acid was isolated from logarithmically growing cells in YES or PMG –*ura-arg* media at 32°C and was then subjected to DNAse treatment and RT-PCR using oligodT as a primer (Scott, *et al.*, 2006). Expression was analyzed by quantitative PCR using SYBR Green on a BioRad iCycler using primers specific to the integrated copy of *ura4<sup>+</sup>* or *arg3<sup>+</sup>* and normalized to expression from the *act1<sup>+</sup>* locus.

**Table S1 List of yeast strains used in this study.**

|         | Genotype                                                                                                                                                    |
|---------|-------------------------------------------------------------------------------------------------------------------------------------------------------------|
| KFY503  | <i>h<sup>90</sup> pCen1-3C (ura3<sup>+</sup>) ade6-210 leu1-32 his3D arg3D4 ura4 293</i>                                                                    |
| KFY1174 | <i>h<sup>90</sup> pCen1-3C (ura3<sup>+</sup>)imr(<math>\Delta</math>ala<math>\Delta</math>glu)::ade6<sup>+</sup> ade6DN/N arg3D4 his3D leu1032 ura4 293</i> |
| KFY1175 | <i>h<sup>90</sup> pCen1-3C (ura3<sup>+</sup>)imr(<math>\Delta</math>ala<math>\Delta</math>glu)::ade6<sup>+</sup> ade6DN/N arg3D4 his3D leu1032 ura4 293</i> |
| KFY556  | <i>h+ imr1L(Hind III)::ura4<sup>+</sup> leu1-32 ade6-210 ura4D18 arg3D4 his3D</i>                                                                           |
| KFY557  | <i>h- imr1L(Hind III)::ura4<sup>+</sup> leu1-32 ade6-210 ura4D18 arg3D4 his3D</i>                                                                           |
| KFY1568 | <i>h+ imr1R (HindIII)::arg3<sup>+</sup> ura4D18 his3D arg4D4 leu1-32 ade6DN/N</i>                                                                           |
| KFY1569 | <i>h- imr1R (HindIII)::arg3<sup>+</sup> ura4D18 his3D arg4D4 leu1-32 ade6DN/N</i>                                                                           |
| KFY1597 | <i>h- imr1R (HindIII)::arg3<sup>+</sup> imr1L (HindIII)::ura4 ura4D18 his3D arg3D4 leu1-32 ade6-210</i>                                                     |
| KFY1598 | <i>h<sup>90</sup> imr1R (HindIII)::arg3<sup>+</sup> imr1L (HindIII)::ura4<sup>+</sup> ura4D18 his3D arg3D4 leu1-32 ade6-210</i>                             |
| KFY1629 | <i>h- imr1R (HindIII)::arg3<sup>+</sup> imr1L (HindIII)::ura4<sup>+</sup> ura4D18 his3D arg3D4 leu1-32 ade6-210</i>                                         |
| KFY1703 | <i>h<sup>+</sup> cdc25-22 leu1-32 ura4D18 arg3D4 his3D</i>                                                                                                  |
| KFY1871 | <i>h? imr1R (HindIII)::arg3<sup>+</sup> imr1L (HindIII)::ura4<sup>+</sup> cdc25-22 ura4D18 his3D arg3D4 leu1-32 ade6-210</i>                                |
| KFY1912 | <i>h- ars1(MluI)::pREP41XCnp1(Leu2+) leu1-32</i>                                                                                                            |

**Table S2 List of primers used in this study.**

| Primer Name | Sequence                                                                    | Use                              |
|-------------|-----------------------------------------------------------------------------|----------------------------------|
| 47332339    | CGGGATCCGGTTCGAAAAAATTCATCCC                                                | amplify <i>arg3</i> <sup>+</sup> |
| 47332340    | CGGGATCCAAATTGATCCATCCCCTT                                                  | amplify <i>arg3</i> <sup>+</sup> |
| 5055        | GCAAACACATTAATTCTCATGAATTTAGAGATTT<br>CCATTAATAACTTGATTTTAGACTCAATTAATATTT  | Δala                             |
| 5056        | AAATATTAATATTGAGTCTAAAACAAGTTATTAATG<br>GAAATCTCTAAATTCATGAGAATTAATGTGTTTGC | Δala                             |
| 5057        | AAAAAAAAAAAAAAAAAGAGATAATTTTTTTATAAGC<br>TACTTTTTATTTGAAATTA                | Δglu                             |
| 5058        | TTAATTTCAAATAAAAAAGTAGCTTATAAAAAAAT<br>TATCTCTTTTTTTTTTTTTTTT               | Δglu                             |
| 6705        | CGCGGATCCATTGTTFTACCAACTGCT                                                 | pcr check                        |
| 6708        | CGCGGATCCTCGCAGCCTTCAATAACT                                                 | pcr check                        |
| 7453        | AATCCAACCGTGAGAAGATGA                                                       | Actin RT                         |
| 7454        | ACGACCAGAGGCATACAAAGA                                                       | Actin RT                         |
| BW84F       | CGGCATCGCTTGTACTTTTT                                                        | panhet RT                        |
| BW84R       | GACGGAACCAATGATGTGA                                                         | panhet RT                        |
| 5373        | AAATCACCGGAGCAATGTTT                                                        | Site1 RT                         |
| 5374        | AAACACCATGGTTTGTTTGTTA                                                      | Site1 RT                         |
| 5375        | TCATTCGTTGTACCAACTGCT                                                       | Site2 RT                         |
| 5376        | TGTGTTTGCCATCTTACAATTCA                                                     | Site2 RT                         |
| 201301      | TGCGGTTGAGTGTAGGAAAA                                                        | Site3 RT                         |
| 201302      | CTGATAGCACATAAACTTTATCATCA                                                  | Site3 RT                         |
| 201307      | GCCAGACTTTCTTAGGATATGAATT                                                   | cen2het_imr2F                    |
| 201308      | CATCAGTTCGAAATCATTCTACTTG                                                   | cen2het_imr2R                    |
| 201309      | TTGTTGCCGCACTTGATG                                                          | cen3het_imr3F                    |
| 201310      | TCATGCATACATTACCGATCTACC                                                    | cen3het_imr3R                    |
