# Supplementary material for: Centromeric Barrier Disruption Leads to Mitotic Defects in Schizosaccharomyces pombe
Source: PubMed Central journal article supplement (PMC4059236; doi:10.1534/g3.114.010397), 2014-02-13
Supplement: supp_g3.114.010397_FigureS1.pdf [file supp_g3.114.010397_FigureS1.pdf]

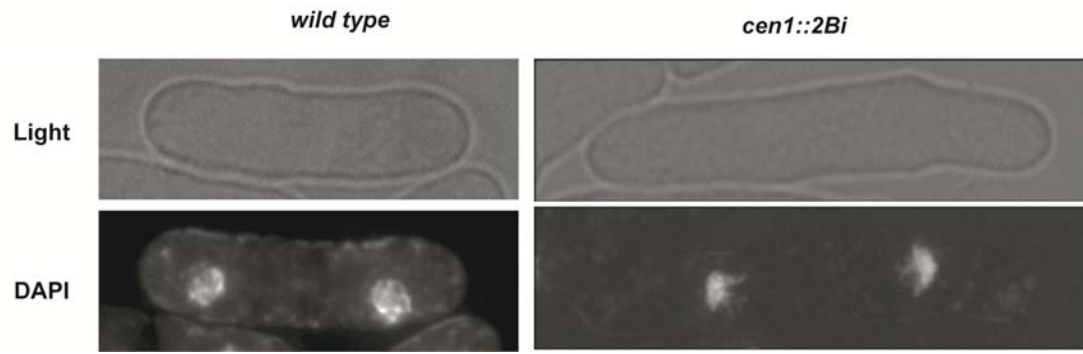

**Figure S1** The *cen1::2Bi* mutant displays abnormally long morphology. Light and fluorescence microscopy images of binuclear cells of the indicated ethanol-fixed strains with DAPI staining of the DNA.
