# Supplementary material for: Centromeric Barrier Disruption Leads to Mitotic Defects in Schizosaccharomyces pombe
Source: PubMed Central journal article supplement (PMC4059236; doi:10.1534/g3.114.010397), 2014-02-13
Supplement: supp_g3.114.010397_FigureS2.pdf [file supp_g3.114.010397_FigureS2.pdf]

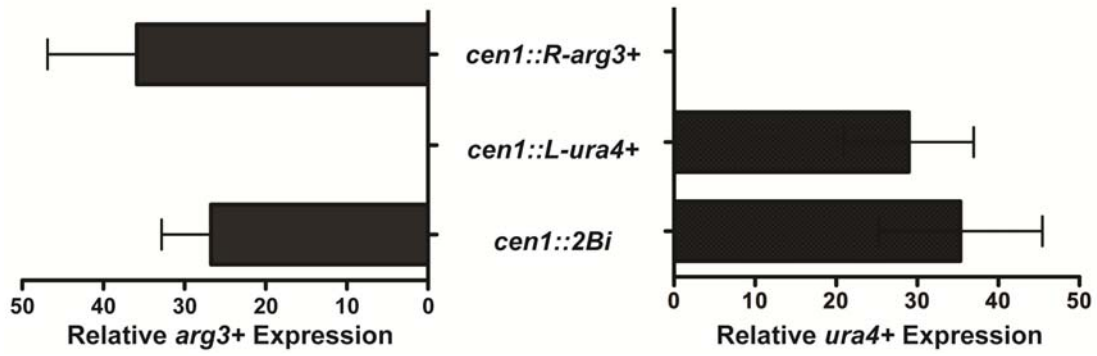

**Figure S2** Barriers are intact in the *cen1::2Bi* mutant. Relative *ura4*<sup>+</sup> and *arg3*<sup>+</sup> gene expression in *cen1::L-ura4+*, *cen1::R-arg3+* and *cen1::2Bi* strains. Reporter gene expression was assayed by quantitative RT-PCR and values are reported as expression relative to an internal control, *act1*<sup>+</sup>.
