# Supplementary material for: Centromeric Barrier Disruption Leads to Mitotic Defects in Schizosaccharomyces pombe
Source: PubMed Central journal article supplement (PMC4059236; doi:10.1534/g3.114.010397), 2014-02-13
Supplement: supp_g3.114.010397_TableS1.pdf [file supp_g3.114.010397_TableS1.pdf]

**Table S1 List of yeast strains used in this study.**

|         | Genotype                                                                                                                        |
|---------|---------------------------------------------------------------------------------------------------------------------------------|
| KFY503  | <i>h<sup>90</sup> pCen1-3C (ura3<sup>+</sup>) ade6-210 leu1-32 his3D arg3D4 ura4 293</i>                                        |
| KFY1174 | <i>h<sup>90</sup> pCen1-3C (ura3<sup>+</sup>)imr(ΔalaΔglu)::ade6<sup>+</sup> ade6DN/N arg3D4 his3D leu1032 ura4 293</i>         |
| KFY1175 | <i>h<sup>90</sup> pCen1-3C (ura3<sup>+</sup>)imr(ΔalaΔglu)::ade6<sup>+</sup> ade6DN/N arg3D4 his3D leu1032 ura4 293</i>         |
| KFY556  | <i>h+ imr1L(Hind III)::ura4<sup>+</sup> leu1-32 ade6-210 ura4D18 arg3D4 his3D</i>                                               |
| KFY557  | <i>h- imr1L(Hind III)::ura4<sup>+</sup> leu1-32 ade6-210 ura4D18 arg3D4 his3D</i>                                               |
| KFY1568 | <i>h+ imr1R (HindIII)::arg3<sup>+</sup> ura4D18 his3D arg4D4 leu1-32 ade6DN/N</i>                                               |
| KFY1569 | <i>h- imr1R (HindIII)::arg3<sup>+</sup> ura4D18 his3D arg4D4 leu1-32 ade6DN/N</i>                                               |
| KFY1597 | <i>h- imr1R (HindIII)::arg3<sup>+</sup> imr1L (HindIII)::ura4 ura4D18 his3D arg3D4 leu1-32 ade6-210</i>                         |
| KFY1598 | <i>h<sup>90</sup> imr1R (HindIII)::arg3<sup>+</sup> imr1L (HindIII)::ura4<sup>+</sup> ura4D18 his3D arg3D4 leu1-32 ade6-210</i> |
| KFY1629 | <i>h- imr1R (HindIII)::arg3<sup>+</sup> imr1L (HindIII)::ura4<sup>+</sup> ura4D18 his3D arg3D4 leu1-32 ade6-210</i>             |
| KFY1703 | <i>h<sup>+</sup> cdc25-22 leu1-32 ura4D18 arg3D4 his3D</i>                                                                      |
| KFY1871 | <i>h? imr1R (HindIII)::arg3<sup>+</sup> imr1L (HindIII)::ura4<sup>+</sup> cdc25-22 ura4D18 his3D arg3D4 leu1-32 ade6-210</i>    |
| KFY1912 | <i>h- ars1(MluI)::pREP41XCnp1(Leu2+) leu1-32</i>                                                                                |
