# Supplementary material for: Centromeric Barrier Disruption Leads to Mitotic Defects in Schizosaccharomyces pombe
Source: PubMed Central journal article supplement (PMC4059236; doi:10.1534/g3.114.010397), 2014-02-13
Supplement: supp_g3.114.010397_TableS2.pdf [file supp_g3.114.010397_TableS2.pdf]

**Table S2 List of primers used in this study.**

| Primer Name | Sequence                                                                    | Use                              |
|-------------|-----------------------------------------------------------------------------|----------------------------------|
| 47332339    | CGGGATCCGGTTCGAAAAAATTCATCCC                                                | amplify <i>arg3</i> <sup>+</sup> |
| 47332340    | CGGGATCCAAATTGATCCATCCCCTT                                                  | amplify <i>arg3</i> <sup>+</sup> |
| 5055        | GCAAACACATTAATTCTCATGAATTTAGAGATTT<br>CCATTAATAACTTGATTTTAGACTCAATTAATATTT  | Δala                             |
| 5056        | AAATATTAATATTGAGTCTAAAACAAGTTATTAATG<br>GAAATCTCTAAATTCATGAGAATTAATGTGTTTGC | Δala                             |
| 5057        | AAAAAAAAAAAAAAAAAGAGATAATTTTTTTATAAGC<br>TACTTTTTATTTGAAATTA                | Δglu                             |
| 5058        | TTAATTTCAAATAAAAAAGTAGCTTATAAAAAAAT<br>TATCTCTTTTTTTTTTTTTTTT               | Δglu                             |
| 6705        | CGCGGATCCATTGTTFTACCAACTGCT                                                 | pcr check                        |
| 6708        | CGCGGATCCTCGCAGCCTTCAATAACT                                                 | pcr check                        |
| 7453        | AATCCAACCGTGAGAAGATGA                                                       | Actin RT                         |
| 7454        | ACGACCAGAGGCATACAAAGA                                                       | Actin RT                         |
| BW84F       | CGGCATCGCTTGTACTTTTT                                                        | panhet RT                        |
| BW84R       | GACGGAACCAATGATGTGA                                                         | panhet RT                        |
| 5373        | AAATCACCGGAGCAATGTTT                                                        | Site1 RT                         |
| 5374        | AAACACCATGGTTTGTTTGTTA                                                      | Site1 RT                         |
| 5375        | TCATTCGTTGTACCAACTGCT                                                       | Site2 RT                         |
| 5376        | TGTGTTTGCCATCTTACAATTCA                                                     | Site2 RT                         |
| 201301      | TGCGGTTGAGTGTAGGAAAA                                                        | Site3 RT                         |
| 201302      | CTGATAGCACATAAACTTTATCATCA                                                  | Site3 RT                         |
| 201307      | GCCAGACTTTCTTAGGATATGAATT                                                   | cen2het_imr2F                    |
| 201308      | CATCAGTTCGAAATCATTCTACTTG                                                   | cen2het_imr2R                    |
| 201309      | TTGTTGCCGCACTTGATG                                                          | cen3het_imr3F                    |
| 201310      | TCATGCATACATTACCGATCTACC                                                    | cen3het_imr3R                    |
